# Supplementary material for: Visible light active Zr- and N-doped TiO2 coupled g-C3N4 heterojunction nanosheets as a photocatalyst for the degradation of bromoxynil and Rh B along with the H2 evolution process
Source: Royal Society of Chemistry journal article supplement (doi:10.1039/d1na00460c), 2021-01-01
Supplement: d1na00460c1.pdf [file d1na00460c1.pdf]

## Visible Light Active Zr and N Doped TiO<sub>2</sub> Coupled g-C<sub>3</sub>N<sub>4</sub> Heterojunctions Nanosheet as Photocatalysts for Degradation of Bromoxynil and Rh B along with H<sub>2</sub> Evolution Process

Souman Pahi, Sumanta Sahu, Satish kumar Singh, Abhijit Behera, and Raj Kishore Patel\*

Department of Chemistry, National Institute of Technology, Rourkela, India.

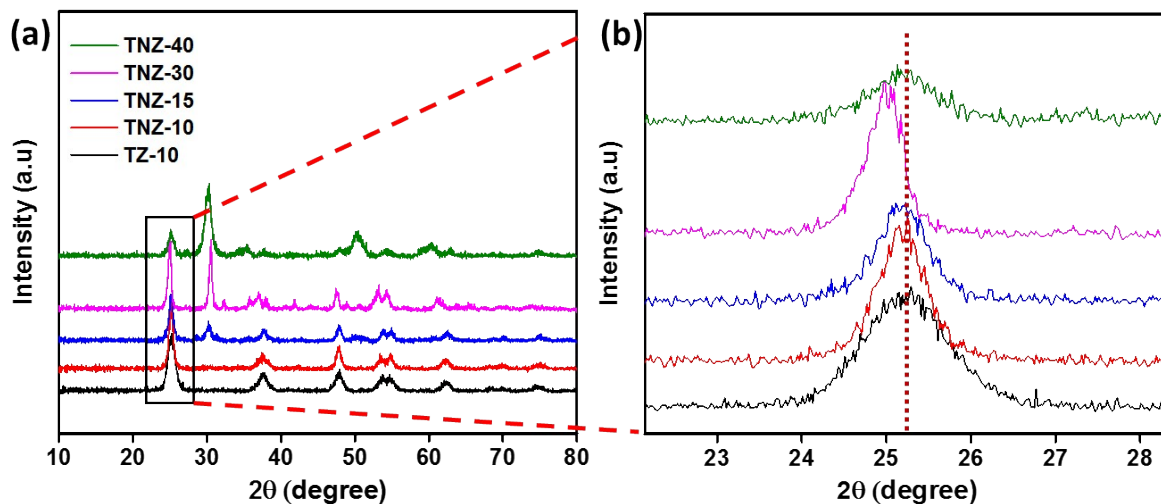

**Figure S1** (a) XRD plot of Zr and N doped titania with a varying dopant concentration of Zr from 10-40 wt% and also N undoped TZ-10 system. (b) represents the enlarged picture of the (101) plane shifting to the lower diffraction angle.

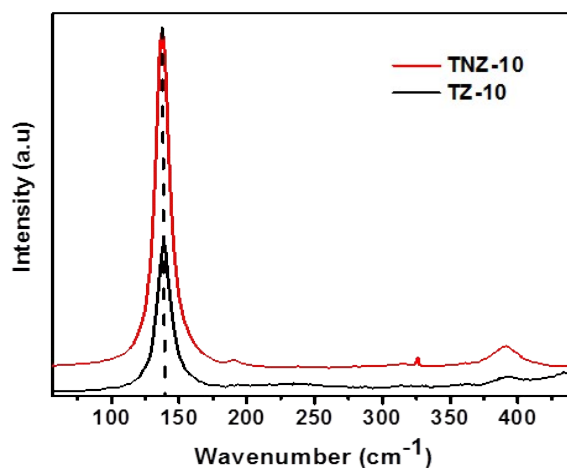

**Figure S2.** Raman spectra of N doped TNZ -10 and undoped TZ -10

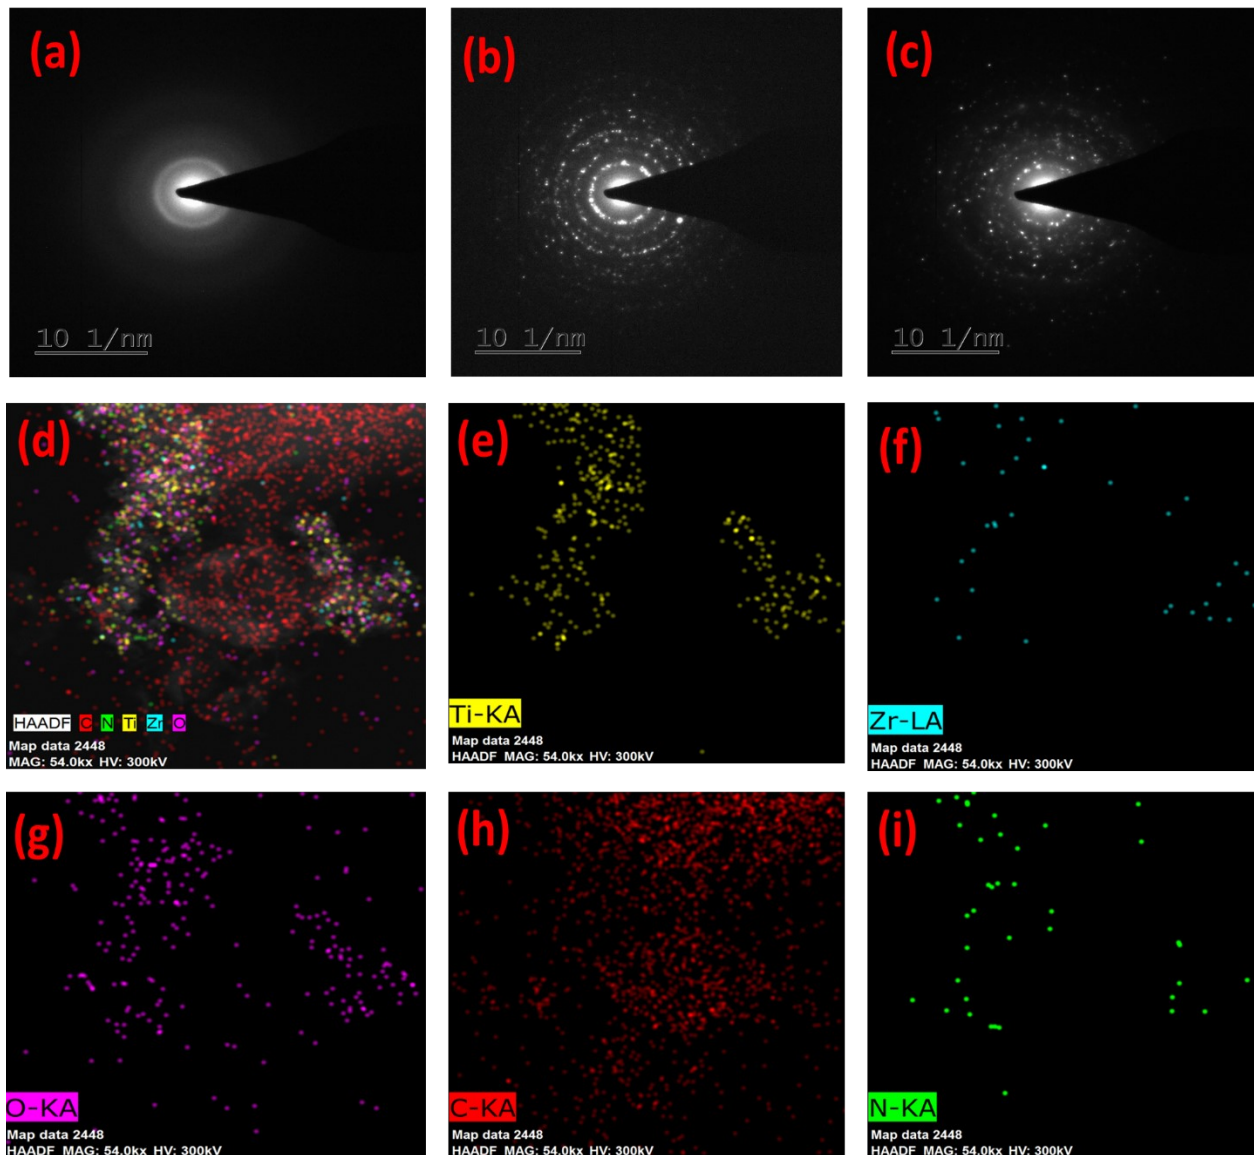

**Figure S3.** EDS mapping of synthesized TNZ-10-CN provides elemental composition and distribution throughout the material.

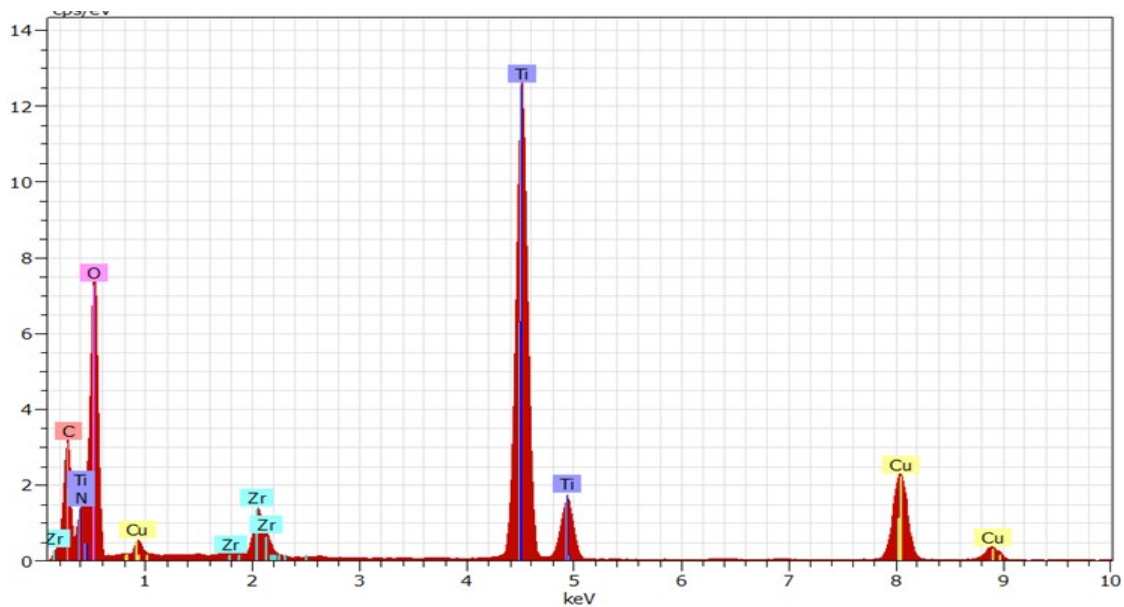

**Figure S4.** EDX (energy-dispersive X-ray) analysis shows constituent elements in the material.

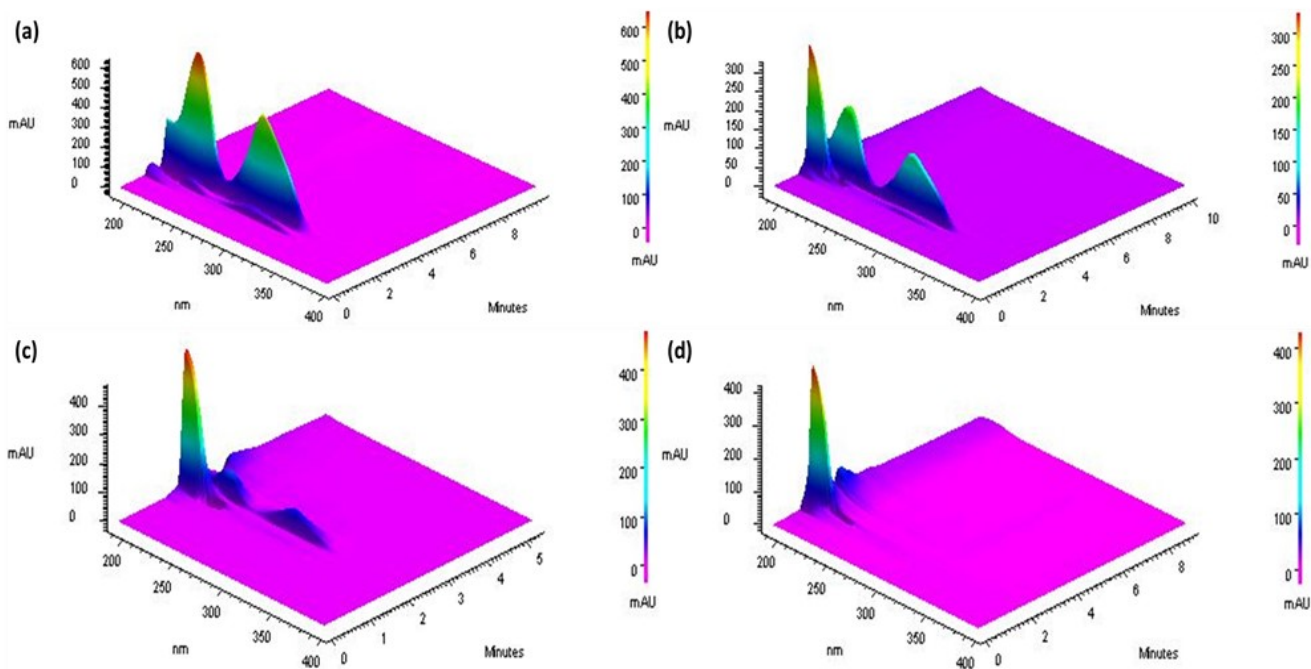

**Figure S5.** 3D representation of Bromoxynil degradation through HPLC-UV displays retention time-wavelength plot. Graphs (a), (b), (c), and (d) are the degradation results of samples withdrawn after 0 min, 20 min, 40 min, and 60 min of light irradiation.

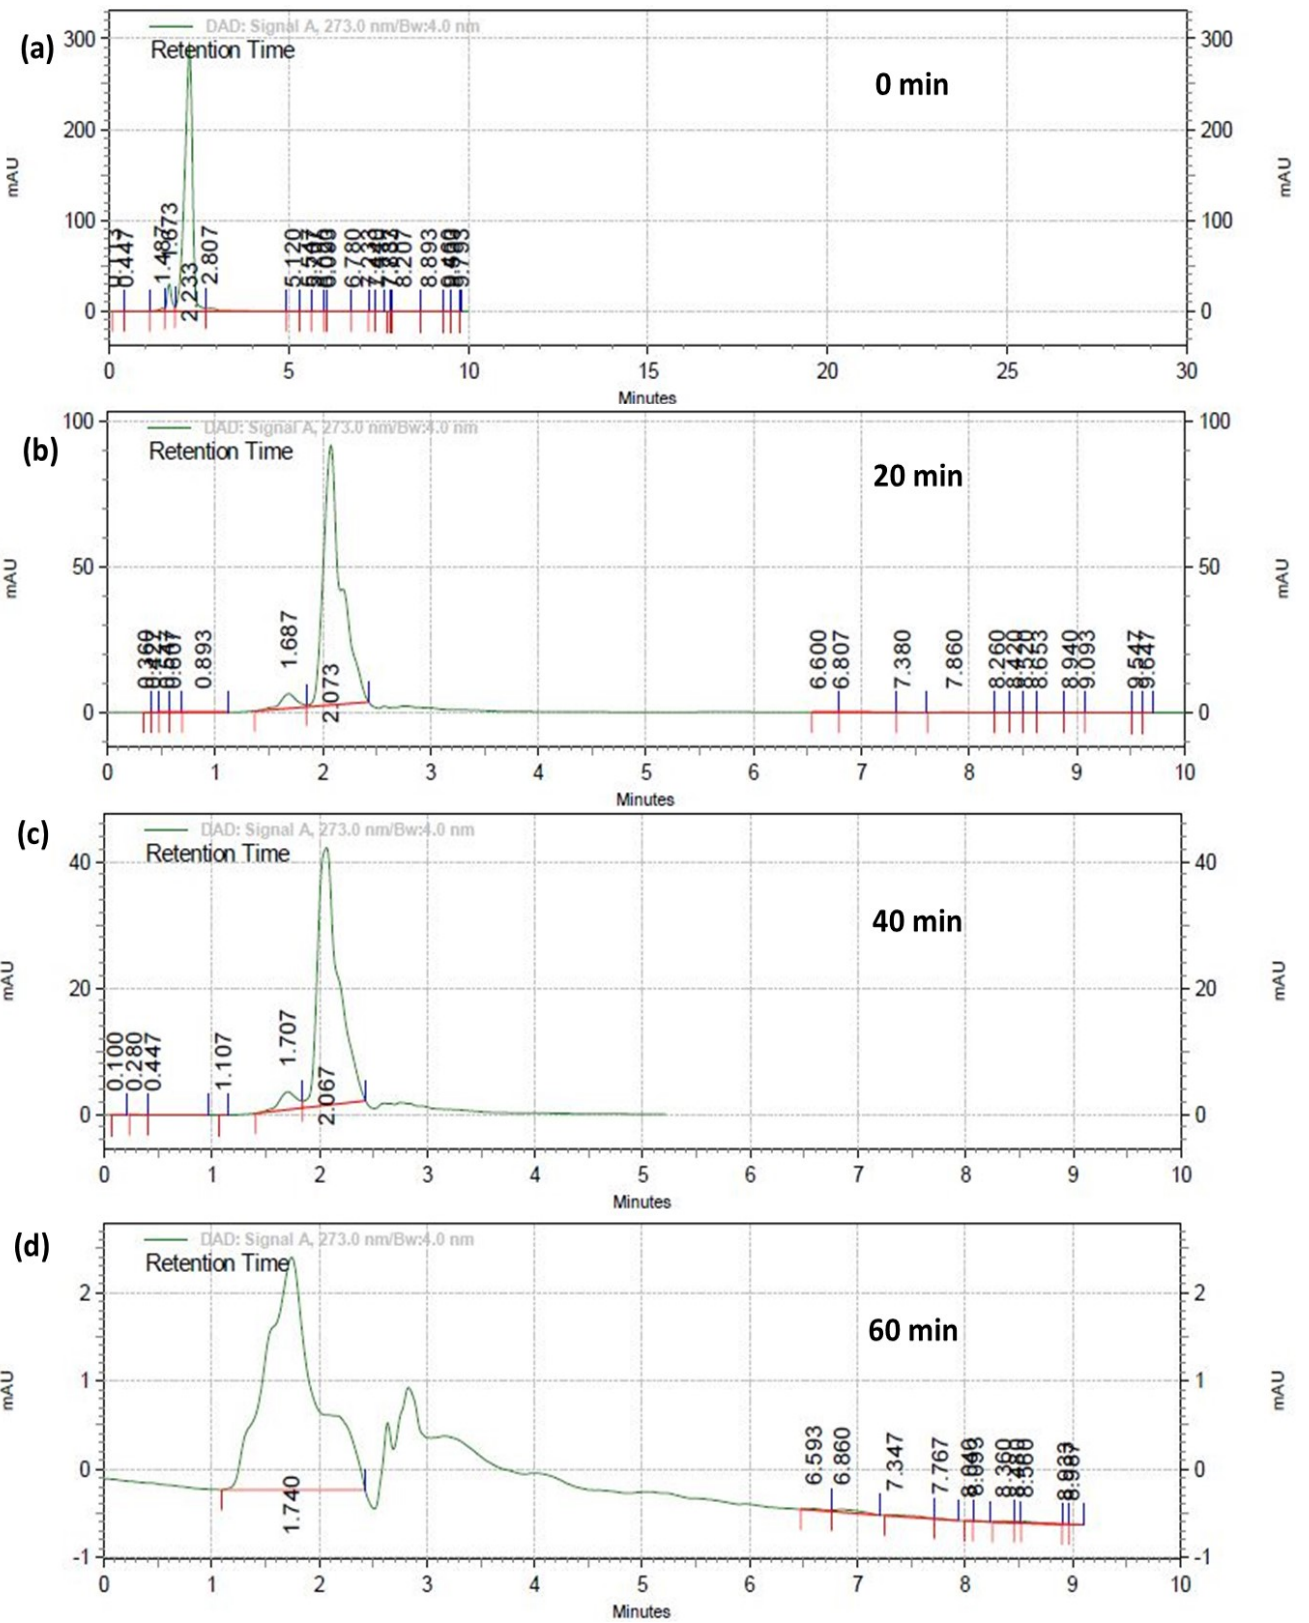

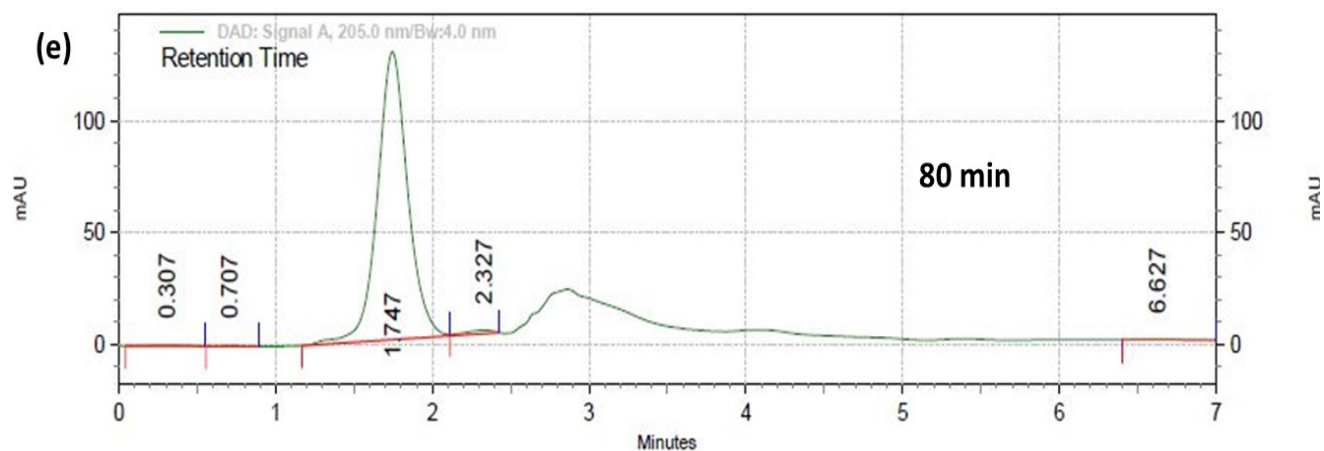

**Figure S6.** HPLC-UV plot of samples withdrawn after 0min, 20min, 40min, 60min, and 80min of time intervals respectively.

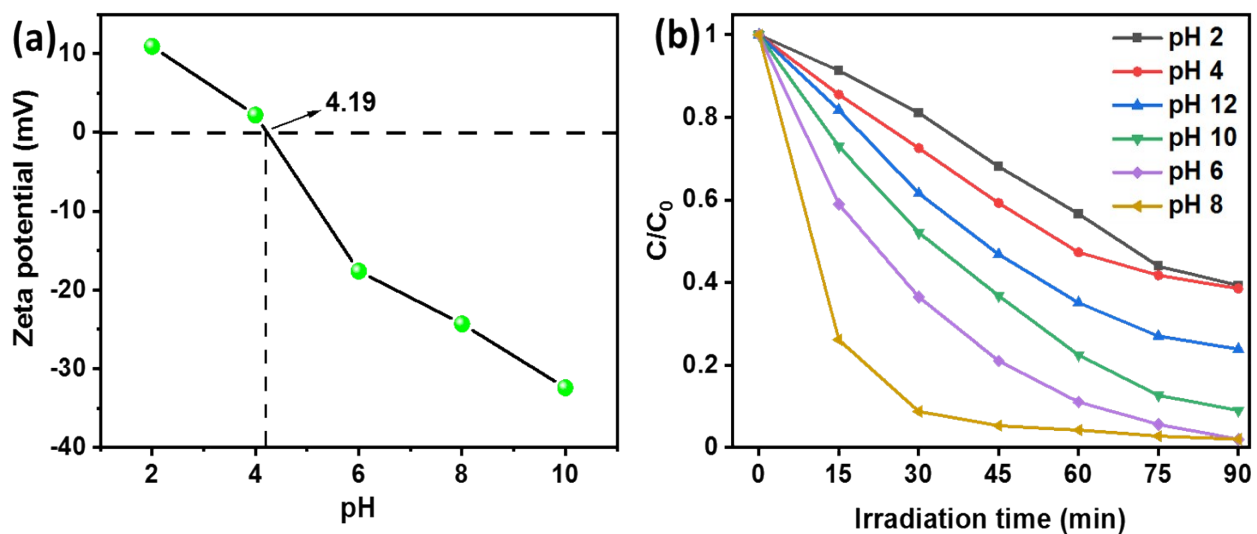

**Figure S7(a)** Zeta potential of active material TNZ-10-CN, **(b)** degradation of bromoxynil at different pH.

**Table 1.** The different weight ratios of doped titania (TNZ-x) and g-C<sub>3</sub>N<sub>4</sub> (CN) along with their degradation efficiency (%).

| Catalyst         | Weight Ratio | Degradation (%) |
|------------------|--------------|-----------------|
|                  | 1:2          | 83.46           |
| <b>TNZ-10-CN</b> | <b>1:4</b>   | <b>98.70</b>    |
|                  | 1:6          | 90.83           |
|                  | 1:2          | 54.61           |
| <b>TNZ-20-CN</b> | 1:4          | 60.72           |
|                  | 1:6          | 58.13           |
|                  | 1:2          | 51.57           |
| <b>TNZ-30-CN</b> | 1:4          | 56.46           |
|                  | 1:6          | 55.80           |

**The apparent quantum efficiency of H<sub>2</sub> evolution should be measured.**

**Calculation of apparent Quantum efficiency:**

$$\text{Apparent Conversion efficiency (\%)} = \frac{\text{Stored Chemical Energy (SCE)}}{\text{energy of incident light (EIL)}} \times 100$$

$$\text{Stored Chemical Energy (SCE)} = \frac{N(H_2)}{t} \Delta H_C$$

$$= \text{Moles of } H_2 \text{ produced per second} \times \Delta H_C$$

$$N(H_2) = \text{moles of } H_2 \text{ produced during the reaction}$$

$$t = \text{duration of the reaction (sec)}$$

$$\Delta H_C = \text{combustion heat of } H_2 \text{ (kJ/mol)}$$

$$= 0.0376 \mu\text{molsec}^{-1} \times 285.8 \text{ kJ/mol} \left( H_2 = 2H^+ + \frac{1}{2}O_2; \Delta H_C = 285.8 \frac{\text{kJ}}{\text{mol}} \right)$$

$$= 0.01077 \text{ J/sec}$$

$$\begin{aligned} \text{Incident light intensity (ILI)} &= \frac{Q_i}{4\pi r^2} \\ &= \frac{250 \text{ W}}{4 \times 3.141 \times (4)^2} = 1.243 \text{ W/cm}^2 \end{aligned}$$

$$Q_i = 150 \text{ W}, r = 4 \text{ cm (distance between catalyst surface and lamp)}$$

$$\begin{aligned} \text{Apparent Conversion efficiency (\%)} &= \frac{0.01077 \text{ J/sec}}{1.243 \text{ W/cm}^2} \times 100 \\ &= 0.866 \% \end{aligned}$$

The apparent quantum efficiency of H<sub>2</sub> conversion reaction has cropped up to 0.86%.

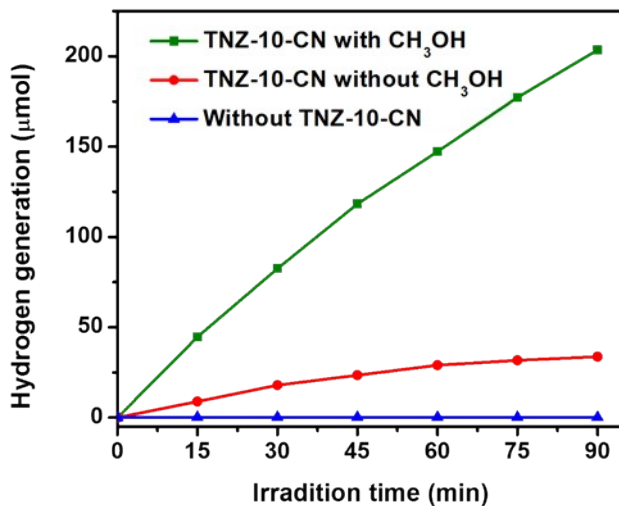

**Figure S8.** The comparative study of photocatalytic H<sub>2</sub> evolution without CH<sub>3</sub>OH in the presence of catalyst TNZ-10-CN under visible light and the H<sub>2</sub> evolution without catalyst under visible light irradiation
